# Supplementary material for: Transport of Moving Duck Flocks in Indonesia and Vietnam: Management Practices That Potentially Impact Avian Pathogen Dissemination
Source: Front Vet Sci. 2021 Jul 9;8:673624. doi: 10.3389/fvets.2021.673624 (PMC8299275; doi:10.3389/fvets.2021.673624)
Supplement: Data Sheet 5 — Raw data Vietnam. [file Data_Sheet_5.xlsx]

## Sheet: (Q1 - 4) Vietnam_transporter_in
IDD	UNIQUE_ID	Date	Name_position_enum	Name_Mov_duck1	Name_Mov_duck2	Name_Mov_duck3	FarmRef_Mov_duck1	FarmRef_Mov_duck2	FarmRef_Mov_duck3	Home_mov_duck1_prov	Home_mov_duck1_district	Home_mov_duck1_comm	Home_mov_duck1_village	Home_mov_duck2_prov	Home_mov_duck2_district	Home_mov_duck2_comm	Home_mov_duck2_village	Home_mov_duck3_prov	Home_mov_duck3_district	Home_mov_duck3_comm	Home_mov_duck3_village	Name_transporter	Age_transporter	Home_trans_prov	Home_trans_district	Home_trans_comm	Home_trans_village	Home_trans_longitude	Home_trans_latitude	Duck_trans_scav_imp	Duck_trans_mark_imp	Duck_trans_hatch_imp	Chick_trans_mark_imp	Oth_anim_trans	Oth_anim_trans_spec	Feed_trans	Feed_trans_spec	Oth_trans	Oth_trans_spec	Oth_sourc1_imp	Oth_sourr1_spec	Oth_sourc2_imp	Oth_sourr2_spec	Oth_sourc3_imp	Oth_sour3_spec	Comments_farmer1	Own_land_yes	Own_land_no	Own_size_type
1	DT-07CAO QUOC VU	2009-12-30	TRUONG BAO TRAN	07			07															CAO QUOC VU	50	DONG THAP	THAP MUOI	MY AN TOWN	2	10.31.897'	105.50.289'	1-Very important	4-Not applicable	4-Not applicable	4-Not applicable	4-Not applicable		4-Not applicable		4-Not applicable		4-Not applicable		4-Not applicable		4-Not applicable			FALSE	TRUE
2	DT08	2009-12-25	NGUYEN THI HONG NHI	NGUYEN VAN PHUONG	SAU LON	BINH	DT06			DONG THAP	TAN HONG	TAN CONG CHI	BAC TRANG	LONG AN		HUNG DIEN		DONG THAP	TAN HONG	THONG BINH		TRAN VAN MAI	57	DONG THAP	TAN HONG	AN PHUOC	AN PHAT	10.49.010'	105.28.500'	1-Very important	4-Not applicable	4-Not applicable	4-Not applicable	4-Not applicable		3-Not very important	FEED TABLET FOR DUCK	4-Not applicable		4-Not applicable		4-Not applicable		4-Not applicable			FALSE	TRUE
3	DT-08CAO VAN THIET	2009-12-30	TRUONG BAO TRAN	08			08															CAO VAN THIET	52	DONG THAP	THAP MUOI	MY AN TOWN	2	10.31.452'	105.49.769'	1-Very important	4-Not applicable	4-Not applicable	4-Not applicable	4-Not applicable		4-Not applicable		4-Not applicable		4-Not applicable		4-Not applicable		4-Not applicable			FALSE	TRUE
4	DT-09CAO VAN VUI	2009-12-30	TRUONG BAO TRAN	09			09															CAO VAN VUI	48	DONG THAP	THAP MUOI	MY AN TOWN	PHU MY	10.27.285'	105.53.814'	2-Important	4-Not applicable	4-Not applicable	4-Not applicable	4-Not applicable		3-Not very important	FEED FOR DUCK	4-Not applicable		1-Very important	RICE FIELD	4-Not applicable		4-Not applicable			TRUE	FALSE	13000 M2
5	DT-10CAO VAN HIEU	2009-12-30	TRUONG BAO TRAN	NGUYEN HONG HAI	TRAN THI LAN	NGUYEN VAN BAY	10			DONG THAP	THAP MUOI	DOC BINH KIEU	2	DONG THAP	THAP MUOI	MY DONG	4	DONG THAP	THAP MUOI	MY QUI	2	CAO VAN HIEU	42	DONG THAP	THAP MUOI	MY AN TOWN	2	10.31.644'	105.50.411'	1-Very important	4-Not applicable	4-Not applicable	4-Not applicable	4-Not applicable		4-Not applicable		4-Not applicable		4-Not applicable		4-Not applicable		4-Not applicable			FALSE	TRUE
6	DT-11TRAN VAN MOT	2009-12-29	NGUYEN THI THU	LE VAN BE	DINH VAN MAN	NGUYEN VAN VUONG	11			DONG THAP	CAO LANH			DONG THAP	CHAU THANH			DONG THAP	THAP MUOI			TRAN VAN MOT	42	DONG THAP	CHAU THANH	AN PHU THUAN	PHU AN	10.11.928'	105.54.124'	2-Important	4-Not applicable	4-Not applicable	4-Not applicable	4-Not applicable		4-Not applicable		4-Not applicable		4-Not applicable		4-Not applicable		4-Not applicable			TRUE	FALSE	10.000 M2
7	DT-12PHAM VAN DEP	2010-01-11	NGUYEN THI HONG NHI	NGUYEN VAN TRUONG	NGUYEN THANH TUNG	PHAM HUU LOI	12			DONG THAP	CAO LANH	PHUONG THINH	5	DONG THAP	CAO LANH	PHUONG THINH	5	DONG THAP	CAO LANH	PHUONG THINH	5	PHAM VAN DEP	46	DONG THAP	CAO LANH	PHUONG THINH	5	10.36.290'	105.39.181'	1-Very important	4-Not applicable	4-Not applicable	4-Not applicable	4-Not applicable		4-Not applicable		4-Not applicable		4-Not applicable		4-Not applicable		4-Not applicable			FALSE	FALSE	23.600 M2
8	DT-13NGPHUOCLANH	2009-12-29	NGYEN THI THU	PHAM VAN MUOI	LE VAN DIEN		13			DONG THAP	CHAU THANH	AN PHU THUAN	PHU AN	DONG THAP	CHAU THANH	AN PHU THUAN	PHU AN					NGPHUOCLANH	51	DONG THAP	CHAU THANH	AN PHU THUAN	PHU AN	10.11.929'	105.54.129'	2-Important	4-Not applicable	4-Not applicable	4-Not applicable	4-Not applicable		4-Not applicable		4-Not applicable		4-Not applicable		4-Not applicable		4-Not applicable			TRUE	FALSE	6.000 M2
9	DT-14NGVANBUOC	2010-02-09	NGUYEN THI MY LINH	NGUYEN VAN HAI	LE VAN BA	NGUYEN HONG DUNG	14			DONG THAP	TAN HONG	SA RAI TOWN		TIEN GIANG	CAI LAY			DONG THAP	TAN HONG	THONG BINH		NGVANBUOC	43	LONG AN	TAN HUNG	HUNG DIEN B	KINH MUOI	10.24.269'	105.35.424'	1-Very important	4-Not applicable	4-Not applicable	4-Not applicable	4-Not applicable		4-Not applicable		4-Not applicable		4-Not applicable		4-Not applicable		4-Not applicable			FALSE	FALSE
10	NGUYEN VAN MAN	2009-12-30	TRUONG BAO TRAN	NGUYEN VAN MAN	TRAN VAN DEP	TRAN VAN TRUONG	NGUYEN VAN MAN	TRAN VAN DEP	TRAN VAN TRUONG	DONG THAP	THAP MUOI	MY DONG	1	DONG THAP	THAP MUOI	THANH MY	1	DONG THAP	THAP MUOI	MY AN		CAO VAN LAN	26	DONG THAP	THAP MUOI	MY AN	2	10.31.449'	105.49.783'	2-Important	4-Not applicable	4-Not applicable	4-Not applicable	4-Not applicable		3-Not very important	FEED TABLET	4-Not applicable		4-Not applicable		4-Not applicable		4-Not applicable			FALSE	TRUE
11	NGUYEN VAN TUNG	2009-12-30	NGUYEN TAN TAI	NGUYEN VAN TUNG	LE VAN BA		NGUYEN VAN TUNG	LE VAN BA		DONG THAP	THAP MUOI	MY AN		DONG THAP	THAP MUOI	PHU DIEN						NGUYEN THI TIM	49	DONG THAP	THAP MUOI	MY CHI	MY NAM 1	10.31.158'	105.50.784'	1-Very important	4-Not applicable	4-Not applicable	4-Not applicable	4-Not applicable		4-Not applicable		4-Not applicable		4-Not applicable		4-Not applicable		4-Not applicable			FALSE	TRUE
12	TG-DIEP THANH ANH	2009-12-13	NGUYEN VAN KHANG																			DIEP THANH ANH	43	TIEN GIANG	CAI LAY	CAI LAY TOWN	6	10.24.056'	106.07.055'	1-Very important	4-Not applicable	4-Not applicable	4-Not applicable	4-Not applicable		4-Not applicable		1-Very important	HATCHERIE	4-Not applicable							FALSE	TRUE
13	TG-HO VAN LUA	2009-12-14	NGUYEN VAN KHANG																			HO VAN LUA	41	TIEN GIANG	CHAU THANH	DUONG DIEM	NAM	10.24.195'	106.12.387'	1-Very important	2-Important	3-Not very important	4-Not applicable	3-Not very important	PIG	2-Important	FEED FOR DUCK	3-Not very important	TRANSPORT THE DUCK MOVE TO SLAUGHTER HOUSE	2-Important	TRANSPORTER WATER	4-Not applicable		4-Not applicable			FALSE	TRUE
14	TG-HUYNH XUAN HA	2009-12-12	NGUYEN VAN KHANG																			HUYNH XUAN HA	62	TIEN GIANG	CAI LAY	LONG TIEN	MY THANH A	10.24.473'	106.07.100'	1-Very important	4-Not applicable	4-Not applicable	4-Not applicable	4-Not applicable		4-Not applicable		2-Important	TO TRANSPORT THE DUCKS TO SLAUGHTER HOUSE	2-Important	TO TRANSPORT THE DUCKS TO SLAUGHTER HOUSE						FALSE	TRUE
15	TG-NG THI DIEM HONG	2009-12-14	NGUYEN VAN KHANG																			NGUYEN THI DIEM HONG	37	TIEN GIANG	CAI LAY	TAN HOI	TAN PHONG	10.24.138'	106.09.438'	4-Not applicable	4-Not applicable	1-Very important	4-Not applicable	4-Not applicable		4-Not applicable		1-Very important	DUCK EGG	4-Not applicable		4-Not applicable		4-Not applicable			FALSE	TRUE
16	TG-NGUYEN THANH PHI	2009-12-13	NGUYEN VAN KHANG																			NGUYEN THANH PHI	28	TIEN GIANG	CAI LAY	LONG TIEN	MY THANH 1	10.24.473'	106.07.100'	1-Very important	4-Not applicable	4-Not applicable	4-Not applicable	4-Not applicable		4-Not applicable		4-Not applicable		4-Not applicable		4-Not applicable		4-Not applicable			FALSE	TRUE
17	TG-NGUYEN VAN DUC	2009-12-14	NGUYEN VAN KHANG	Mr. BAY LY	Mr. HAI DONG	Mr. NGUYEN VAN TAM				AN GIANG				DONG THAP				TIEN GIANG	CAI LAY	MY HANH DONG		NGUYEN VAN DUC	49	TIEN GIANG	CAI LAY	CAI LAY TOWN	1	10.24.324'	106.07.131'	1-Very important	4-Not applicable	4-Not applicable	4-Not applicable	4-Not applicable		4-Not applicable		3-Not very important	TREES	2-Important	LAND FOR RENT	4-Not applicable		4-Not applicable			FALSE	TRUE
18	TG-NGUYEN VAN HAI	2009-12-13	NGUYEN VAN KHANG	HAI NHA	TAM	SAU AN																NGUYEN VAN HAI	49	TIEN GIANG	GO CONG TAY	THANH NHUT	BINH TAY	10.21.319'	106.31.065'	2-Important	2-Important	4-Not applicable	4-Not applicable	4-Not applicable		4-Not applicable		4-Not applicable		2-Important	LIVESTOCK PIG	4-Not applicable		4-Not applicable			TRUE	FALSE	2.500 M2
19	TG-NGUYEN VAN HUNG	2009-12-11	NGUYEN VAN KHANG																			NGUYEN VAN HUNG	46	TIEN GIANG	CAI LAY	BINH PHU	BINH THANH	10.26.38.7'	106.04.305'	1-Very important	4-Not applicable	4-Not applicable	4-Not applicable	4-Not applicable		4-Not applicable		4-Not applicable		2-Important	LAM RUONG	4-Not applicable		4-Not applicable			TRUE	FALSE	3.000 M2
20	TG-NGUYEN VAN OANH	2009-12-04	NGUYEN VAN KHANG																			NGUYEN VAN OANH	39	TIEN GIANG	CAI BE	HAU MY BAC A	HAU PHU 1	10.30.244'	105.58.253'	2-Important	3-Not very important	3-Not very important	4-Not applicable	4-Not applicable		3-Not very important		4-Not applicable		2-Important	LAM RUONG	4-Not applicable		4-Not applicable			TRUE	FALSE	1.000 M2
21	TG-NGUYEN VAN TANH	2009-12-11	NGUYEN VAN KHANG																			NGUYEN VAN TANH	37	TIEN GIANG	CAI LAY	BINH PHU	BINH THANH	10.26.426'	106.04.290'	2-Important	3-Not very important	4-Not applicable	4-Not applicable	4-Not applicable		4-Not applicable		3-Not very important	TO TRANSPORT EGG	4-Not applicable		4-Not applicable		4-Not applicable			FALSE	TRUE
22	TG-NGUYEN VAN TIEN	2009-12-13	NGUYEN VAN KHANG																			NGUYEN VAN TIEN	62	TIEN GIANG	CAI LAY	LONG TIEN	MY THANH 1	10.24.473'	106.07.100'	1-Very important	4-Not applicable	4-Not applicable	4-Not applicable	4-Not applicable		4-Not applicable		4-Not applicable		4-Not applicable		4-Not applicable		4-Not applicable			FALSE	TRUE
23	TG-NGUYEN VAN TU	2009-12-13	NGUYEN VAN KHANG																			NGUYEN VAN TU	40	TIEN GIANG	CAI LAY	CAI LAY TOWN	3	10.24.101'	106.07.229'	1-Very important	4-Not applicable	4-Not applicable	4-Not applicable	4-Not applicable		4-Not applicable		4-Not applicable		1-Very important	HAVE A SHOP OF A WHOLESCALE DEALER	4-Not applicable		4-Not applicable			FALSE	TRUE
24	TG-PHAM KIM HANG	2009-12-04	NGUYEN VAN KHANG																			PHAM KIM HANG	41	TIEN GIANG	CAI BE	HAU MY BAC A	HAU PHU 1	10.30.060'	105.58.007'	2-Important	4-Not applicable	4-Not applicable	4-Not applicable	4-Not applicable		4-Not applicable		4-Not applicable		2-Important	TO BUY AND SOLD THE MEAT DUCK	4-Not applicable		4-Not applicable			FALSE	TRUE
25	TG-TRAN VAN MINH	2009-12-14	NGUYEN VAN KHANG																			TRAN VAN MINH	40	TIEN GIANG	CAI LAY	TAN PHUC	BAC	10.26.001'	106.11.206'	2-Important	3-Not very important	4-Not applicable	4-Not applicable	4-Not applicable		4-Not applicable		4-Not applicable		4-Not applicable		4-Not applicable		4-Not applicable			FALSE	TRUE
26	TG-TRUONGNGMINH KHOA	2009-12-12	NGUYEN VAN KHANG	NGUYEN VAN TI	PHAM THI BE HAI					TIEN GIANG	CAI LAY	MY HANH DONG		TIEN GIANG	CAI LAY	MY PHUOC DONG						TRUONGNGMINH KHOA	32	TIEN GIANG	CAI LAY	LONG TIEN	MY THANH A	10.24.473'	106.07.100'	1-Very important	4-Not applicable	4-Not applicable	3-Not very important	4-Not applicable		4-Not applicable		4-Not applicable		4-Not applicable		4-Not applicable		4-Not applicable			FALSE	TRUE
27	TRAN THANH HAI	2009-12-05	LE TRI VU																			TRAN THANH HAI	38	AN GIANG	CHAU PHU	MY DUC	MY HOA	09.50.334'	106.08.794'	2-Important	4-Not applicable	1-Very important	4-Not applicable	4-Not applicable		4-Not applicable		4-Not applicable		3-Not very important	HARVEST IN RICE FIELD	4-Not applicable		4-Not applicable			TRUE	FALSE	5.000 M2
28	TRAN VAN HAU	2009-12-30	NGUYEN TAN TAI	TRAN VAN HAU	NGUYEN VAN MINH	LE VAN NHO	TRAN VAN HAU	NGUYEN VAN MINH	LE VAN NHO	DONG THAP	THAP MUOI	MY QUY	LANG BIEN	DONG THAP	THAP MUOI	MY QUY	THANH BINH	DONG THAP	THAP MUOI	MY QUI	THIEN HO	NGUYEN VAN HIEN	32	DONG THAP	THAP MUOI	MY QUI	MY NAM 1	10.31.507'	105.45.671'	1-Very important	3-Not very important	4-Not applicable	4-Not applicable	4-Not applicable		4-Not applicable		4-Not applicable		4-Not applicable		4-Not applicable		4-Not applicable			FALSE	TRUE
29	TRAN VAN LUC	2009-12-30	NGUYEN TAN TAI	TRAN VAN LUC	LE VAN TAI	NGUYEN VAN VINH	TRAN VAN LUC	LE VAN TAI	NGUYEN VAN VINH	DONG THAP	THAP MUOI	MY QUY	BA SAO	DONG THAP	THAP MUOI	MY QUI	BA SAO	DONG THAP	THAP MUOI	MY QUI	BA SAO	NGUYEN VAN VU	39	DONG THAP	THAP MUOI	MY QUI	MY TAY 2	10.31.560'	105.43.423'	1-Very important	4-Not applicable	4-Not applicable	4-Not applicable	4-Not applicable		4-Not applicable		4-Not applicable		4-Not applicable		4-Not applicable		4-Not applicable			TRUE	FALSE	5.000 M2
30	VL-02NGVANNGUYEN	2009-12-05	NGUYEN NHUT TRUONG																			NGVANNGUYEN	48	VINH LONG	BINH MINH	THUAN AN	THUAN THOI	10.04.275'	105.49.553'	1-Very important	4-Not applicable	4-Not applicable	4-Not applicable	4-Not applicable		4-Not applicable		3-Not very important	RICE FIELD	4-Not applicable		4-Not applicable		4-Not applicable			FALSE	TRUE
31	VL-03NGTHIKIMLOAN	2009-12-06																				NGTHIKIMLOAN	38	VINH LONG	TAM BINH	LOAN MY	BINH HOA	10.03.309'	105.55.675'	1-Very important	4-Not applicable	4-Not applicable	4-Not applicable	4-Not applicable		4-Not applicable		4-Not applicable		4-Not applicable		4-Not applicable		4-Not applicable			FALSE	TRUE
32	VL-04LE DUY THONG	2009-12-08																				LE DUY THONG	26	VINH LONG	LONG HO	LONG HO TOWN	6	10.12.454'	105.59.847'	1-Very important	4-Not applicable	3-Not very important	4-Not applicable	4-Not applicable		3-Not very important	FEED DUCK	4-Not applicable		4-Not applicable		4-Not applicable		4-Not applicable			FALSE	TRUE
33	VL-06TRAN VAN THUAN	2009-12-08	NGUYEN NGOC THANH MINH																			TRAN VAN THUAN	55	VINH LONG	BINH MINH	THUAN AN	THUAN TIEN B	10.04.504'	105.50.513'	1-Very important	4-Not applicable	4-Not applicable	4-Not applicable	4-Not applicable		4-Not applicable		4-Not applicable		4-Not applicable		4-Not applicable		4-Not applicable			TRUE	FALSE	8.000 M2
34	VL07	2009-12-08	NGUYEN NHUT TRUONG	BUI VAN VANG			VL07			VINH LONG	LONG HO	LOC HOA	AN HIEP									VO VAN UT(MON)	43	VINH LONG	LONG HO	HOA PHU	LOC HUNG	10.09.563'	105.56.562'	1-Very important	3-Not very important	3-Not very important	4-Not applicable	4-Not applicable		3-Not very important	FEED DUCK	4-Not applicable		4-Not applicable		4-Not applicable		4-Not applicable			TRUE	FALSE	6.000 M2
35	VL07	2009-12-17	NGUYEN NHUT TRUONG	BUI VAN VANG			VL07			VINH LONG	LONG HO	LOC HOA	AN HIEP									NGUYEN VAN DEN	61	VINH LONG	TAM BINH	LOAN MY	BINH PHU	10.03.093'	105.54.719'	2-Important	4-Not applicable	4-Not applicable	4-Not applicable	4-Not applicable		4-Not applicable		3-Not very important		4-Not applicable		4-Not applicable		4-Not applicable			TRUE	FALSE	15.000 M2
36	VL-07TANG QUOC THANG	2009-12-05	NGUYEN NHUT TRUONG																			TANG QUOC THANG	65	VINH LONG	LONG HO	THANH DUC	THANH MY	10.15.038'	105.59.744'	1-Very important	4-Not applicable	1-Very important	4-Not applicable	4-Not applicable		3-Not very important	FEED FOR DUCK	4-Not applicable		4-Not applicable		4-Not applicable		4-Not applicable			TRUE	FALSE	15.000 M2
37	VL09	2009-12-05	NGUYEN NHUT TRUONG	PHAM HONG SON			VL09			VINH LONG	LONG HO	PHU DUC	THONG QUAN									HUYNH MINH TAM	45	VINH LONG	TAM BINH	HAU LOC	No.7	10.08.519'	105.58.085'	2-Important	4-Not applicable	4-Not applicable	3-Not very important	4-Not applicable		3-Not very important	FEED FOR DUCK	4-Not applicable		4-Not applicable		4-Not applicable		4-Not applicable			TRUE	FALSE	10.000 M2
38	VL09	2009-12-09	NGUYEN NHUT TRUONG	PHAM HONG SON			VL09			VINH LONG	LONG HO	PHU DUC	THONG QUAN									TRAN THANH TRI	38	TRA VINH	CAU KE	PHONG THANH	CAY GON	09.50.333'	106.08.796'	1-Very important	2-Important	3-Not very important	4-Not applicable	4-Not applicable		3-Not very important	FEED FOR DUCK AND RICE FIELD	4-Not applicable		4-Not applicable		4-Not applicable		4-Not applicable			TRUE	FALSE	500 M2
39	VL09	2009-12-10	NGUYEN NHUT TRUONG	PHAM HONG SON			VL09			VINH LONG	LONG HO	PHU DUC	THONG QUAN									MAI VAN THOI	42	VINH LONG	TAM BINH	SONG PHU	PHU TRUONG	10.06.638'	105.53.679'	1-Very important	4-Not applicable	4-Not applicable	4-Not applicable	4-Not applicable		3-Not very important	FEED FOR DUCK	4-Not applicable		4-Not applicable		4-Not applicable		4-Not applicable			TRUE	FALSE	4.000 M2
40	VL10 AND DT05	2009-12-25	TRAN VINH HUY	SAU THACH	LE THI DINH					DONG THAP	TAN HONG	TAN HO CO	GO BOI	DONG THAP	TAN HONG	BINH PHU	GO DA					PHAM VU LINH	32	DONG THAP	TAN HONG	BINH PHU	GO DA	10.53.675'	105.26.352'	3-Not very important	4-Not applicable	4-Not applicable	4-Not applicable	2-Important	CHICKEN	3-Not very important				1-Very important		4-Not applicable		4-Not applicable			FALSE	TRUE
41	VL-10NGVANTHANH	2009-12-16	NGUYEN NGOC THANH MINH																			NGVANTHANH	46	VINH LONG	VINH LONG TOWN	WARD 4		10.13.718'	105.59.343'	1-Very important	1-Very important	4-Not applicable	4-Not applicable	3-Not very important	CATTLE	4-Not applicable		2-Important	TO SOLD THE ANYTHING	4-Not applicable		4-Not applicable		4-Not applicable			FALSE	TRUE
42	VL11	2009-12-25	TRAN VINH HUY	HUYNH VAN THINH	SAU CONG		VL11			DONG THAP	TAN HONG	TAN CONG CHI	BAC TRANG 1	DONG THAP	TAN HONG	TAN CONG CHI	BAC TRANG 6					TRAN VAN NHIEU	44	DONG THAP	TAN HONG	TAN CONG CHI	BAC TRANG 1	10.52.514'	105.26.170'	1-Very important	4-Not applicable	4-Not applicable	4-Not applicable	4-Not applicable		4-Not applicable		4-Not applicable		4-Not applicable		4-Not applicable		4-Not applicable			FALSE	TRUE
43	VL-11NGVANHOANGEM	2009-12-16	NGUYEN NHUT TRUONG																			NGVANHOANGEM	31	VINH LONG	BINH MINH	DONG THANH	DONG THANH C	10.04.876'	105.51.543'	1-Very important	4-Not applicable	4-Not applicable	4-Not applicable	4-Not applicable		4-Not applicable		4-Not applicable		4-Not applicable		4-Not applicable		4-Not applicable			TRUE	FALSE	10.000 M2
[truncated: 50 more columns]

## Sheet: (Q5 - 10) Vietnam_transporter_s
IDD	UNIQUE_ID	Date	Q5_Truck_yes	Q5_Truck_yes	Truck_number	Truck_own_rent	Truck_floor_size	Truck_floor_level	Truck_open_close	Truck_max_duck	Truck_pic_yes	Boat_yes	Boat_number	Boat_own_rent	Boat_floor_size	Boat_floor_level	Boat_floor_level	Boat_open_close	Boat_open_close	Boat_max_duck	Boat_pic_yes	Car_yes	Car_number	Car_own_rent	Car_floor_size	Car_floor_level	Car_open_close	Car_max_duck	Car_pic_yes	Motorb_yes	Motorb_number	Motorb_own_rent	Motorb_floor_size	Motorb_floor_level	Motorb_open_close	Motorb_max_duck	Motorb_pic_yes	Bicyc_yes	Bicyc_number	Bicyc_own_rent	Bicyc_floor_size	Bicyc_floor_level	Bicyc_open_close	Bicyc_max_duck	Bicyc_pic_yes	Oth_spec	Oth_yes	Oth_number	Oth_own_rent
1	DT06	2009-12-25	FALSE	FALSE							FALSE	TRUE		3	2.4 M X 18 M	3	3	OPEN	OPEN	5.000	TRUE	FALSE							FALSE	FALSE							FALSE	FALSE							FALSE		FALSE
2	DT-07CAO QUOC VU	2009-12-30	FALSE	FALSE							FALSE	TRUE		1	2.4 M X 16 M	3	3	OPEN	OPEN	4.000	TRUE	FALSE							FALSE	FALSE							FALSE	FALSE							FALSE		FALSE
3	DT-08CAO VAN THIET	2009-12-30	FALSE	FALSE							FALSE	TRUE		1	2.4 M X 16 M	3	3	OPEN	OPEN	2.000	TRUE	FALSE							FALSE	FALSE							FALSE	FALSE							FALSE		FALSE
4	DT-09CAO VAN VUI	2009-12-30	FALSE	FALSE							FALSE	TRUE		1	2.4 M X 18 M	3	3	OPEN	OPEN	2.500	FALSE	FALSE							FALSE	TRUE	2				OPEN	200	FALSE	FALSE							FALSE		FALSE
5	DT-10CAO VAN HIEU	2009-12-30	FALSE	FALSE							FALSE	TRUE	1	1	2.4 M X 18 M	3	3	OPEN	OPEN	2.000	TRUE	FALSE							FALSE	FALSE							FALSE	FALSE							FALSE		FALSE
6	DT-11TRAN VAN MOT	2009-12-29	FALSE	FALSE							FALSE	TRUE		1		3	3	OPEN	OPEN	1.500	TRUE	FALSE							FALSE	FALSE							FALSE	FALSE							FALSE		FALSE
7	DT-12PHAM VAN DEP	2010-01-11	FALSE	FALSE							FALSE	TRUE		1	1.5M X 20M	3	3	OPEN	OPEN	2.000	TRUE	FALSE							FALSE	FALSE							FALSE	FALSE							FALSE		FALSE
8	DT-13NGPHUOCLANH	2009-12-29	FALSE	FALSE							FALSE	TRUE		1		3	3	OPEN	OPEN	1.000	TRUE	FALSE							FALSE	FALSE							FALSE	FALSE							FALSE		FALSE
9	DT-14NGVANBUOC	2010-02-09	FALSE	FALSE							FALSE	TRUE		1	2.9M X 18 M	3	3	OPEN	OPEN	3.000	TRUE	FALSE							FALSE	FALSE							FALSE	FALSE							FALSE		FALSE
10	NGUYEN VAN MAN	2009-12-30	FALSE	FALSE							FALSE	TRUE		1	2.4 M X 16 M	3	3	OPEN	OPEN	2.000	TRUE	FALSE							FALSE	FALSE							FALSE	FALSE							FALSE		FALSE
11	NGUYEN VAN TUNG	2009-12-30	FALSE	FALSE							FALSE	TRUE		1	3M X 20M	2	2	OPEN	OPEN	3.500	TRUE	FALSE							FALSE	FALSE							FALSE	FALSE							FALSE		FALSE
20	TG-NGUYEN VAN OANH	2009-12-04	FALSE	FALSE							FALSE	TRUE		1	2.9M X 18M	3	3	OPEN	OPEN	3.000	TRUE	FALSE							FALSE	FALSE							FALSE	FALSE							FALSE		FALSE
21	TG-NGUYEN VAN TANH	2009-12-11	FALSE	FALSE							FALSE	TRUE		1	2.6 M X 15.6 M	3	3	OPEN	OPEN	1.500	TRUE	FALSE							FALSE	FALSE							FALSE	FALSE							FALSE		FALSE
24	TG-PHAM KIM HANG	2009-12-04	FALSE	FALSE							FALSE	TRUE		1	2.4 M X 14 M	3	3	OPEN	OPEN	1.500	TRUE	FALSE							FALSE	FALSE							FALSE	FALSE							FALSE		FALSE
27	TRAN THANH HAI	2009-12-05	FALSE	FALSE							FALSE	TRUE		1	2M X 19 M	3	3	OPEN	OPEN	3.000	TRUE	FALSE							FALSE	FALSE							FALSE	FALSE							FALSE		FALSE
28	TRAN VAN HAU	2009-12-30	FALSE	FALSE							FALSE	TRUE		1		3	3	OPEN	OPEN	2.500	TRUE	FALSE							FALSE	FALSE							FALSE	FALSE							FALSE		FALSE
29	TRAN VAN LUC	2009-12-30	FALSE	FALSE							FALSE	TRUE		2	1.4M X 10M	1	1	OPEN	OPEN	3.000	TRUE	FALSE							FALSE	FALSE							FALSE	FALSE							FALSE		FALSE
30	VL-02NGVANNGUYEN	2009-12-05	FALSE	FALSE							FALSE	TRUE		1	2.2 M X 17 M	3	3	OPEN	OPEN	2.300	TRUE	FALSE							FALSE	FALSE							FALSE	FALSE							FALSE		FALSE
31	VL-03NGTHIKIMLOAN	2009-12-06	FALSE	FALSE							FALSE	TRUE		1	2.5 M X 17 M	3	3	CLOSE	CLOSE	1.700	TRUE	FALSE							FALSE	FALSE							FALSE	FALSE							FALSE		FALSE
33	VL-06TRAN VAN THUAN	2009-12-08	FALSE	FALSE							FALSE	FALSE		2	2.4 M X 19M	3		OPEN		2.500	TRUE	FALSE							FALSE	FALSE							FALSE	FALSE							FALSE		FALSE
34	VL07	2009-12-05	FALSE	FALSE							FALSE	TRUE		1	2.4 M X 15 M	3	3	OPEN	OPEN	1.800	TRUE	FALSE							FALSE	FALSE							FALSE	FALSE							FALSE		FALSE
35	VL07	2009-12-08	FALSE	FALSE							FALSE	TRUE		1	2 M X 15 M	2	2	CLOSE	CLOSE	1.200	TRUE	FALSE							FALSE	FALSE							FALSE	FALSE							FALSE		FALSE
36	VL07	2009-12-17	FALSE	FALSE							FALSE	TRUE		1	2.2 M X 16 M	2	2	CLOSE	CLOSE	1.500	TRUE	FALSE							FALSE	FALSE							FALSE	FALSE							FALSE		FALSE
38	VL09	2009-12-05	FALSE	FALSE							FALSE	TRUE		1	2.4 M X 15 M	3	3	OPEN	OPEN	1.800	TRUE	FALSE							FALSE	FALSE							FALSE	FALSE							FALSE		FALSE
39	VL09	2009-12-09	FALSE	FALSE							FALSE	TRUE		1	2.7 M X 19 M	3	3	CLOSE	CLOSE	2.200	TRUE	FALSE							FALSE	FALSE							FALSE	FALSE							FALSE		FALSE
40	VL09	2009-12-10	FALSE	FALSE							FALSE	TRUE		2	2.5 M X 17 M	3	3	OPEN	OPEN	2.500	TRUE	FALSE							FALSE	FALSE							FALSE	FALSE							FALSE		FALSE
43	VL11	2009-12-25	FALSE	FALSE							FALSE	TRUE		1	2.4 M X 16 M	3	3	OPEN	OPEN	2.000	TRUE	FALSE							FALSE	FALSE							FALSE	FALSE							FALSE		FALSE
44	VL-11NGVANHOANGEM	2009-12-16	FALSE	FALSE							FALSE	TRUE		1	2.5 M X 19 M	3	3	CLOSE	CLOSE	3.000	TRUE	FALSE							FALSE	FALSE							FALSE	FALSE							FALSE		FALSE
12	TG-DIEP THANH ANH	2009-12-13	FALSE	TRUE			2 M X 6 M	3	OPEN	1.000	TRUE	FALSE									FALSE	FALSE							FALSE	FALSE							FALSE	FALSE							FALSE		FALSE
13	TG-HO VAN LUA	2009-12-14	TRUE	TRUE			2 M X 4.5M	3	OPEN	800	TRUE	FALSE									FALSE	FALSE							FALSE	FALSE							FALSE	FALSE							FALSE		FALSE
14	TG-HUYNH XUAN HA	2009-12-12	TRUE	TRUE		1				1.000	FALSE	FALSE									FALSE	FALSE							FALSE	FALSE							FALSE	FALSE							FALSE		FALSE
15	TG-NG THI DIEM HONG	2009-12-14	TRUE	TRUE			2M X 6M	3	CLOSE	1.000	TRUE	FALSE									FALSE	FALSE							FALSE	FALSE							FALSE	FALSE							FALSE		FALSE
16	TG-NGUYEN THANH PHI	2009-12-13	TRUE	TRUE			1M6 X 3 M	3	OPEN	1.000	FALSE	FALSE									FALSE	FALSE							FALSE	FALSE							FALSE	FALSE							FALSE		FALSE
17	TG-NGUYEN VAN DUC	2009-12-14	TRUE	TRUE			2 M X 6 M	3	OPEN	1.000	TRUE	FALSE									FALSE	FALSE							FALSE	FALSE							FALSE	FALSE							FALSE		FALSE
18	TG-NGUYEN VAN HAI	2009-12-13	TRUE	TRUE			1M4 X 5M	2	CLOSE	400	TRUE	FALSE									TRUE	FALSE							FALSE	FALSE							FALSE	FALSE							FALSE		FALSE
19	TG-NGUYEN VAN HUNG	2009-12-11	TRUE	TRUE					OPEN	800	TRUE	FALSE									FALSE	FALSE							FALSE	FALSE							FALSE	FALSE							FALSE		FALSE
22	TG-NGUYEN VAN TIEN	2009-12-13	TRUE	TRUE			1M6 X 3 M	3	OPEN	800	TRUE	FALSE									FALSE	FALSE							FALSE	FALSE							FALSE	FALSE							FALSE		FALSE
23	TG-NGUYEN VAN TU	2009-12-13	TRUE	TRUE			2M X 6M	2	OPEN	900	TRUE	FALSE									FALSE	FALSE							FALSE	FALSE							FALSE	FALSE							FALSE		FALSE
25	TG-TRAN VAN MINH	2009-12-14	TRUE	TRUE			2 M X 4.5M	3	OPEN	800	TRUE	FALSE									FALSE	FALSE							FALSE	FALSE							FALSE	FALSE							FALSE		FALSE
26	TG-TRUONGNGMINH KHOA	2009-12-12	TRUE	TRUE							FALSE	FALSE									FALSE	FALSE							FALSE	FALSE							FALSE	FALSE							FALSE		FALSE
32	VL-04LE DUY THONG	2009-12-08	TRUE	TRUE			2.2 M X 4.5 M	3	OPEN	1.500	TRUE	FALSE									FALSE	FALSE							FALSE	FALSE							FALSE	FALSE							FALSE		FALSE
37	VL-07TANG QUOC THANG	2009-12-05	TRUE	TRUE		4	2,3 M X 7.5 M	2	OPEN	1.500	TRUE	FALSE									FALSE	FALSE							FALSE	FALSE							FALSE	FALSE							FALSE		FALSE
41	VL10 AND DT05	2009-12-25	TRUE	TRUE			1M4 X 6 M	2	OPEN	400	TRUE	FALSE									FALSE	FALSE							FALSE	FALSE							FALSE	FALSE							FALSE		FALSE
42	VL-10NGVANTHANH	2009-12-16	TRUE	TRUE			1M6 X 3 M	3	CLOSE	500	TRUE	FALSE									FALSE	FALSE							FALSE	FALSE							FALSE	FALSE							FALSE		FALSE
[truncated: 140 more columns]

## Sheet: (Q11 - 25) Vietnam_transporter_
IDD	UNIQUE_ID	Date	Q11_Tran1_purch	Tran1_purch_price	Tran1_purch_when	Tran2_purch	Tran2_purch_price	Tran2_purch_when	Tran3_purch	Tran3_purch_price	Tran3_purch_when	Q12_Tran1_rent	Tran1_rent_price	Tran1_rent_when	Tran2_rent	Tran2_rent_price	Tran2_rent_when	Tran3_rent	Tran3_rent_price	Tran3_rent_when	Q13_Tran1_item	Tran1_item_1	Tran1_item_2	Tran1_item_3	Tran1_item_1_cost	Tran1_item_2_cost	Tran1_item_3_cost	Tran2_item	Tran2_item_1	Tran2_item_2	Tran2_item_3	Tran2_item_1_cost	Tran2_item_2_cost	Tran2_item_3_cost	Tran3_item	Tran3_item_1	Tran3_item_2	Tran3_item_3	Tran3_item_1_cost	Tran3_item_2_cost	Tran3_item_3_cost	Q14_Tran1_type_det	Tran1_min_jour	Tran1_ave_jour	Tran1_max_jour	Tran1_min_disto	Tran1_ave_disto	Tran1_ave_disto_copy1	Tran1_max_disto
1	DT06	2009-12-25	NO HAVE																		BOAT	OIL		WAGES TO DRIVER AND WORKER	30.000.000 VND		20.000.000 VND PER YEAR															BOAT	100	120	140	2.000 KM	3.000 KM	3.000 KM	5.000 KM
2	DT-07CAO QUOC VU	2009-12-30	NO HAVE																		BOAT	OIL	DISINFECTANT	WAGES TO DRIVER AND WORKER	14.000.000 VND	500.000 VND PER YEAR	8.000.000 VND	OIL	DISINFECTANT	WAGES TO DRIVER AND WORKER	29.000.000 VND PER YEAR	1.000.000 VND PER YEAR	18.000.000 VND PER YEAR									BOAT	80	130	170	26.000 KM	48.000.000 KM	48.000 KM	60.000 KM
3	DT-08CAO VAN THIET	2009-12-30	NO HAVE																		BOAT	OIL	DISINFECTANT	WAGES TO DRIVER AND WORKER	10.000.000 VND PER YEAR	500.000 VND PER YEAR	12.500.000 VND PER YEAR															BOAT	80	120	160	8.800 KM	12.900 KM	12.900 KM	14.000 KM
4	DT-09CAO VAN VUI	2009-12-30	NO HAVE																		BOAT	OIL	DISINFECTANT	WAGES TO DRIVER AND WORKER	8.000.000 VND PER YEAR	300.000 VND PER YEAR	10.000.000 VND PER YEAR	OIL	DISINFECTANT		5.000.000 VND PER YEAR	300.000 VND PER YEAR										BOAT	24	42	60	1.584		12312	23.040 KM
5	DT-10CAO VAN HIEU	2009-12-30	NO HAVE																		BOAT	OIL	DISINFECTANT	WAGES TO DRIVER AND WORKER	25.000.000 VND	500.000 VND PER YEAR	20.000.000 VND PER YEAR															BOAT	50	125	130	40.000 KM	55.000 KM	55.000 KM	60.000 KM
6	DT-11TRAN VAN MOT	2009-12-29	NO HAVE																		BOAT	OIL	DISINFECTANT	WAGES TO DRIVER AND WORKER	10.000.000 VND																	BOAT	40	60	80	4 KM	1.200 KM	1.200 KM	2.500 KM
7	DT-12PHAM VAN DEP	2010-01-11	NO HAVE																		BOAT	OIL	DISINFECTANT	WAGES TO DRIVER AND WORKER	20.000.000 VND PER YEAR	1.000.000 VND PER YEAR	12.000.000 VND PER YEAR															BOAT	150	180	200
8	DT-13NGPHUOCLANH	2009-12-29	NO HAVE																		BOAT	OIL	DISINFECTANT	WAGES TO DRIVER AND WORKER	3.000.000 VND PER YEAR																	BOAT	30	40	50	150 KM	825 KM	825 KM	1.500 KM
9	DT-14NGVANBUOC	2010-02-09	NO HAVE																		BOAT	OIL	DISINFECTANT	WAGES TO DRIVER AND WORKER	25.000.000 VND	500.000 VND PER YEAR	12.500.000 VND PER YEAR															BOAT	80	100	120	20 KM	50 KM	50 KM	150 KM
10	NGUYEN VAN TUNG	2009-12-30	NO HAVE																		BOAT	OIL	DISINFECTANT	WAGES TO DRIVER AND WORKER	12.000.000 VND PER YEAR	1.500.000 VND PER YEAR	17.000.000 VND PER YEAR															BOAT	130	150	180	500 KM	5.000 KM	5.000 KM	30.000 KM
19	TG-NGUYEN VAN OANH	2009-12-04	NO HAVE																		BOAT	OIL	DISINFECTANT	WAGES TO DRIVER AND WORKER	1.000.000 VND PER 1 TRIP	50.000 VND PER 1 TIME	200.000 VND PER 1 DAY															BOAT	100	130	150	3.000 KM	13.000 KM	13.000 KM	19.000 KM
20	TG-NGUYEN VAN TANH	2009-12-11	NO HAVE																		BOAT	OIL	DISINFECTANT	WAGES TO DRIVER AND WORKER	1.000.000 VND PER 1 TRIP	50.000 VND PER 1 TRIP	220.000 VND PER 1 DAY															BOAT	60	90	120	3.000 KM	6.000	6.000	15.000 KM
23	TG-PHAM KIM HANG	2009-12-04	NO HAVE																		BOAT	OIL	DISINFECTANT	WAGES TO DRIVER AND WORKER	400.000 VND PER 1 TRIP	50.000 VND PER 1 TRIP	150.000 VND PER 1 DAY															BOAT	50	75	100	700 KM	6.000 KM	6.000 KM	14.000 KM
26	TRAN THANH HAI	2009-12-05	NO HAVE																		BOAT	OIL	DISINFECTANT	WAGES WORKER	1.300.000 PER 100KM	0	0															BOAT	15	20	18	2 KM	100 KM	100 KM	300 KM
27	TRAN VAN HAU	2009-12-30	NO HAVE																		BOAT	OIL	DISINFECTANT	WAGES TO DRIVER AND WORKER	15.000.000 VND PER 1 YEAR	1.000.000 VND PER 1 YEAR	12.000.000 VND PER 1 YEAR															BOAT	36	84	120	720 KM	2.400 KM	2.400 KM	3.600 KM
28	TRAN VAN LUC	2009-12-30	NO HAVE																		BOAT	OIL	DISINFECTANT	WAGES TO DRIVER AND WORKER	80.000.000 VND	4.000.000 VND PER YEAR	36.000.000 VND PER YEAR															BOAT	120	150	180	600 KM	1.500 KM	1.500 KM	54.000 KM
29	TRAN VAN MAN	2009-12-30	NO HAVE																		BOAT	OIL	DISINFECTANT	WAGES TO DRIVER AND WORKER	10.000.000 VND PER YEAR	1.000.000 VND PER 1 YEAR	11.000.000 VND PER YEAR															BOAT	90	110	150	6.000 KM	10.000 KM	10.000 KM	12.000 KM
30	VL-02NGVANNGUYEN	2009-12-05	NO HAVE																		BOAT	OIL		WAGES TO DRIVER AND WORKER	1.200.000 VND PER 1 TRIP		400.000 VND PER 1 DAY															BOAT	12	20	30	300 KM	1.000 KM	1.000 KM	3.000 KM
31	VL-03NGTHIKIMLOAN	2009-12-06	NO HAVE																		BOAT	OIL			1.000.000 VND PER 1 TRIP																	BOAT	60	80	160	2880 KM	6.000 KM	6.000 KM	9.000 KM
33	VL-06TRAN VAN THUAN	2009-12-08	NO HAVE																		BOAT	OIL	DISINFECTANT	WAGES TO DRIVER AND WORKER	10.000.000 VND PER YEAR	1.000.000 VND PER YEAR	4.000.000 VND PER YEAR	BOAT	OIL	DISINFECTANT	WAGES TO DRIVER AND WORKER	10.000.000 VND PER YEAR	1.000.000 VND PER YEAR	4.000.000 VND PER YEAR								BOAT	100	120	140	500 KM	1.200 KM	1.200 KM	2.000 KM
34	VL07	2009-12-08	NO HAVE																		BOAT	OIL		WAGES TO DRIVER AND WORKER	700.000 VND PER 1 TRIP		100.000 VND PER 1 DAY															BOAT	60	120	150	500 KM	27.000 KM	27.000 KM	30.000 KM
35	VL07	2009-12-17	NO HAVE																		BOAT	OIL		WAGES TO DRIVER AND WORKER	700.000 VND PER 1 TRIP		100.000 VND PER 1 DAY															BOAT	40	700	110	700 KM	8.400 KM	8.400 KM	21.000 KM
37	VL09	2009-12-02	NO HAVE																		BOAT	OIL		WAGES TO DRIVER AND WORKER	1.000.000 VND PER TRIP		120.000 VND PER TRIP															BOAT	25	120	250	500 KM	1.800 KM	1.800 KM	3.500 KM
38	VL09	2009-12-09	NO HAVE																		BOAT	OIL		WAGES TO DRIVER AND WORKER	18.000.000 VND PER YEAR		48.000.000 VND PER YEAR															BOAT	90	100	120	9.000 KM	12.000 KM	12.000 KM	15.000 KM
39	VL09	2009-12-10	NO HAVE																		BOAT	OIL		WAGES TO DRIVER AND WORKER	17.000.000 VND PER YEAR		18.000.000 VND PER YEAR	BOAT	OIL		WAGES TO DRIVER AND WORKER	17.000.000 VND PER YEAR		18.000.000 VND PER YEAR								BOAT	15	60	90	3.600 KM	12.000 KM	12.000 KM	25.000 KM
42	VL11	2009-12-25	NO HAVE																		BOAT	OIL	DISINFECTANT	WAGES TO DRIVER AND WORKER	10.000.000 VND PER YEAR	1.000.000 VND PER 1 YEAR	10.000.000 VND PER YEAR															BOAT	90	110	150	6.000 KM	10.000 KM	10.000 KM	12.000 KM
43	VL-11NGVANHOANGEM	2009-12-16	NO HAVE																		BOAT	OIL		WAGES TO DRIVER AND WORKER	1.700.000 VND PER 1 TRIP		250.000 VND PER 1 DAY															BOAT	36	120	220	2.500 KM	15.000 KM	15.000 KM	22.000 KM
11	TG-DIEP THANH ANH	2009-12-13	NO HAVE																		TRUCK	OIL	DISINFECTANT	WAGES TO DRIVER AND WORKER	18 LITRE PER 100 KM	20.000 VND PER 1 TIME	220.000 VND PER 1 DAY															TRUCK	100	120	150
12	TG-HO VAN LUA	2009-12-14	NO HAVE																		TRUCK	OIL	DISINFECTANT	WAGES TO DRIVER AND WORKER	350.000 VND PER 1 TRIP	40.000 VND PER 1 TIME	200.000 VND PER 1 DAY															TRUCK	10	15	25	500 KM	900 KM	900 KM	2.000 KM
13	TG-HUYNH XUAN HA	2009-12-12	NO HAVE																		TRUCK	OIL	DISINFECTANT	WAGES TO DRIVER	1.000.000 VND PER 1 TRIP	0	200.000 VND PER 1 DAY															TRUCK	40	100	200	6.000 KM	15.000 KM	15.000 KM	30.000 KM
14	TG-NG THI DIEM HONG	2009-12-14	NO HAVE																		TRUCK	OIL	DISINFECTANT	WAGES TO DRIVER AND WORKER	350.000 PER 100 KM	50.000 VND PER 1 TIME	150.000 VND PER 1 DAY															TRUCK	150	200	300	750 KM	2.000 KM	2.000 KM	4.000 KM
15	TG-NGUYEN THANH PHI	2009-12-13	NO HAVE																		TRUCK	OIL	DISINFECTANT	WAGES TO DRIVER AND WORKER	17 L PER 100 KM		200.000 VND PER 100 KM															TRUCK	80	120	150	8.000 KM	12.000 KM	12.000 KM	20.000 KM
16	TG-NGUYEN VAN DUC	2009-12-14	NO HAVE																		TRUCK	OIL	DISINFECTANT		12 LITRE PER 100 KM	NOT FREE OF CHARGE	NOT FREE OF CHARGE															TRUCK	50	75	100	500 KM	3.000 KM	3.000 KM	5.000 KM
17	TG-NGUYEN VAN HAI	2009-12-13	NO HAVE																		TRUCK	OIL	DISINFECTANT	WAGES TO DRIVER AND WORKER	8 LITRE PER 100 KM	20.000 VND PER 1 TIME	0															TRUCK	20	50	100	750 KM	1.250 KM	1.250 KM	2.500 KM
18	TG-NGUYEN VAN HUNG	2009-12-11	NO HAVE																		TRUCK	OIL	DISINFECTANT	WAGES TO DRIVER	1.000.000 VND PER 1 TRIP	0	200.000 VND PER 1 DAY															TRUCK	80	100	150	4.000 KM	10.000 KM	10.000 KM	23.000 KM
21	TG-NGUYEN VAN TIEN	2009-12-13	NO HAVE																		TRUCK	OIL	DISINFECTANT	WAGES TO DRIVER AND WORKER	15 L PER 100 KM	NOT FREE OF CHARGE	200.000 TO 250.000 VND PER 100 KM															TRUCK	70	100	150	7.000 KM	10.000 KM	10.000 KM	18.000 KM
22	TG-NGUYEN VAN TU	2009-12-13	NO HAVE									YES	1.000.000 VND PER 100 KM	IN PERIOD 1 DAY							TRUCK	OIL	DISINFECTANT	WAGES TO DRIVER	18 LITRE PER 100 KM	NOT FREE OF CHARGE	200.000 VND PER 100 KM															TRUCK	80	100	200	8.000 KM	10.000 KM	10.000 KM	23.000 KM
24	TG-TRAN VAN MINH	2009-12-14	NO HAVE																		TRUCK	OIL	DISINFECTANT	WAGES TO DRIVER AND WORKER	300.000 PER 100 KM	25.000 VND PER 1 TIME	150.000 VND PER 1 TIME															TRUCK	5	10	20	600 KM	3.100 KM	3.100 KM	5.500 KM
25	TG-TRUONGNGMINH KHOA	2009-12-12	NO HAVE																		TRUCK	OIL	DISINFECTANT	WAGES TO DRIVER AND WORKER	1.000.000 VND PER 1 TRIP	0	24.000.000 VND PER YEAR															TRUCK	50	90	180	6.500 KM	15.000 KM	15.000 KM	29.000 KM
32	VL-04LE DUY THONG	2009-12-08	NO HAVE																		TRUCK	OIL	DISINFECTANT	WAGES TO DRIVER AND WORKER	13.000.000 VND PER YEAR	1.500.000 VND PER YEAR	18.000.000 VND PER YEAR															TRUCK	50	70	120	25.000 KM	35.000 KM	35.000 KM	100.000 KM
36	VL-07TANG QUOC THANG	2009-12-05	NO HAVE																		TRUCK	OIL	DISINFECTANT	WAGES TO DRIVER AND WORKER	60.000.000 VND PER 1 YEAR/1TRUCK	500.000 VND PER 1 YEAR/1 TRUCK	10.000.000 VND PER 1 YEAR/1 TRUCK	TRUCK	OIL	DISINFECTANT	WAGES TO DRIVER AND WORKER	60.000.000 VND PER 1 YEAR/1TRUCK	500.000 VND PER YEAR/1TRUCK	10.000.000 VND PER YEAR								TRUCK	35	50	70	10.000 KM	12.000 KM	12.000 KM	30.000 KM
40	VL10 AND DT05	2009-12-25	NO HAVE																		TRUCK	OIL	DISINFECTANT	WAGES TO DRIVER AND WORKER	500.000 VND PER 1 MONTH	100.000 VND PER MONTH	500.000 VND PER MONTH															TRUCK	200	DON'T KNOW	DON'T KNOW	480 KM	1.000 KM	1.000 KM	2.000 KM
41	VL-10NGVANTHANH	2009-12-16	NO HAVE																		TRUCK	OIL	DISINFECTANT		60.000.000 VND PER YEAR	6.000.000 VND PER YEAR																TRUCK	100	120	150	10.000 KM	12.000 KM	12.000 KM	75.000 KM
[truncated: 169 more columns]

## Sheet: (Q26 - 39) Vietnam_transporter_
IDD	UNIQUE_ID	Date	Faeces_remov	Faeces_remov_det	Water_surf	Water_surf_det	Soap_surf	Soap_surf_det	Disinf_surf	Disinf_surf_det	CompAir_surf	CompAir_surf_det	Oth_clean	Oth_clean_det	Oth_clean_spec	Add_proc_deaths	House_clean	House_clean_det	River_clean	River_clean_copy1	River_clean_det	Villa_clean	Vill_clean_det	CarWash_clean	CarWash_det	Oth_cleanloc	Oth_cleanloc_spec	Oth_cleanloc_det	Comments_farmer6	Stor_gara	Stor_gara_det	Stor_gara_exp	Stor_gara_exp_det	Stor_outs	Q29_Stor_outs_copy1	Stor_outs_det	Stor_outs_exp	Stor_outs_exp_copy1	Stor_outs_exp_det	Stor_oth	Stor_oth_spec	Stor_oth_det	Stor_oth_exp	Stor_oth_exp_det	N_coll_duck	Pay_rec_coll_duck	Pay_con_coll_duck	N_load_duck	Pay_rec_load_duck
1	DT06	2009-12-25	1-Common	USE FEECES TO PLAN THE TREE	1-Common	THROWN AWAY INTO LOCAL RIVER	4-Never		3-Not common	BENKOCID	4-Never		4-Never				FALSE		TRUE	TRUE	USE WATER TO CLEAN THE BOAT	FALSE		FALSE		FALSE	IN THE RIVER			FALSE		FALSE		FALSE	TRUE		FALSE	FALSE		TRUE	IN THE RIVER		FALSE
2	DT-07CAO QUOC VU	2009-12-30	1-Common	USE WATER TO CLEAN AND THROWN AWAY IN LOCAL RIVER	1-Common	THROWN AWAY INTO LOCAL RIVER	3-Not common		2-Sometimes	BENKOCID	4-Never		4-Never			NO HAVE	FALSE		TRUE	TRUE	USE WATER TO CLEAN THE BOAT	FALSE		FALSE		TRUE	IN THE RIVER			FALSE		FALSE		FALSE	FALSE		FALSE	FALSE		FALSE			FALSE		1	100.000 VND PER 1 TRIP
3	DT-08CAO VAN THIET	2009-12-30	1-Common	USE WATER TO CLEAN AND THROWN AWAY IN LOCAL RIVER	1-Common	THROWN AWAY INTO LOCAL RIVER	2-Sometimes	OMO	2-Sometimes	BENKOCID	4-Never		4-Never			NO HAVE	FALSE		TRUE	TRUE	USE WATER TO CLEAN THE BOAT	FALSE		FALSE		TRUE	IN THE RIVER			FALSE		FALSE		FALSE	TRUE		FALSE	FALSE		TRUE	IN THE RIVER		FALSE		1	800.000 VND PER 1 MONTH	1 800.000 PER 1 MONTH
4	DT-09CAO VAN VUI	2009-12-30	1-Common	USE WATER TO CLEAN AND THROWN AWAY IN LOCAL RIVER	1-Common	THROWN AWAY INTO LOCAL RIVER	2-Sometimes		2-Sometimes	BENKOCID	4-Never		4-Never			NO HAVE	FALSE		TRUE	TRUE	USE WATER TO CLEAN THE BOAT	FALSE		FALSE		TRUE	IN THE RIVER			TRUE	IN FRONT OF HOME IN THE RIVER	FALSE		FALSE	TRUE		FALSE	FALSE		TRUE	IN THE RIVER		FALSE		1	30.000 VND PER TRIP
5	DT-10CAO VAN HIEU	2009-12-30	1-Common	USE WATER TO CLEAN AND THROWN AWAY IN LOCAL RIVER	1-Common	THROWN AWAY INTO LOCAL RIVER	1-Common		1-Common	BENKOCID	3-Not common	ALCOHOL	4-Never			NO HAVE	FALSE		FALSE	TRUE		FALSE		FALSE		TRUE	IN THE RIVER			TRUE	IN FRONT OF HOME IN THE RIVER	FALSE		FALSE	TRUE		FALSE	FALSE		TRUE	IN THE RIVER		FALSE		1	50.000 VND PER TRIP
6	DT-11TRAN VAN MOT	2009-12-29	1-Common	USE WATER TO CLEAN AND THROWN AWAY IN LOCAL RIVER	2-Sometimes	THROWN AWAY INTO LOCAL RIVER	3-Not common		1-Common	BENKOCID	4-Never		4-Never			NO HAVE	FALSE		FALSE	TRUE		FALSE		FALSE		TRUE	IN THE RIVER			FALSE		FALSE		FALSE	FALSE		FALSE	FALSE		FALSE			FALSE
7	DT-12PHAM VAN DEP	2010-01-11	1-Common	USE WATER TO CLEAN AND THROWN AWAY IN LOCAL RIVER	2-Sometimes	THROWN AWAY INTO LOCAL RIVER	2-Sometimes		1-Common	BENKOCID	4-Never		4-Never			NO HAVE	FALSE		TRUE	TRUE	USE WATER TO CLEAN THE BOAT	FALSE		FALSE		TRUE	IN THE RIVER			FALSE		FALSE		TRUE	TRUE	IN THE RIVER	FALSE	FALSE		FALSE			FALSE		1	50.000 VND PER TRIP
8	DT-13NGPHUOCLANH	2009-12-29	1-Common	USE WATER TO CLEAN AND THROWN AWAY IN LOCAL RIVER	2-Sometimes	THROWN AWAY INTO LOCAL RIVER	4-Never		4-Never		4-Never		4-Never			NO HAVE	FALSE		TRUE	TRUE	USE WATER TO CLEAN THE BOAT	FALSE		FALSE		TRUE	IN THE RIVER			FALSE		FALSE		TRUE	TRUE	IN THE RIVER	FALSE	FALSE		FALSE			FALSE		1	50.000 VND PER TRIP
9	DT-14NGVANBUOC	2010-02-09	1-Common	USE WATER TO CLEAN AND THROWN AWAY IN LOCAL RIVER	1-Common	THROWN AWAY INTO LOCAL RIVER	1-Common	TIDE	1-Common	BENKOCID	3-Not common	ALCOHOL	4-Never			NO HAVE	FALSE		TRUE	TRUE	USE WATER TO CLEAN THE BOAT	FALSE		FALSE		FALSE				TRUE	IN FRONT OF HOME IN THE RIVER	FALSE		TRUE	TRUE	IN THE RIVER	FALSE	FALSE		TRUE	IN THE RIVER		FALSE		1	50.000 VND PER TRIP
10	NGUYEN VAN MAN	2009-12-30	1-Common	USE WATER TO CLEAN AND THROWN AWAY IN LOCAL RIVER	1-Common	THROWN AWAY INTO LOCAL RIVER	4-Never		2-Sometimes	BENKOCID	4-Never		4-Never			NO HAVE	FALSE		TRUE	TRUE	USE WATER TO CLEAN THE BOAT	FALSE		FALSE		TRUE	IN THE RIVER			FALSE		FALSE		FALSE	TRUE		FALSE	FALSE		TRUE	IN THE RIVER		FALSE		1	50.000 VND PER 1 DAY	50.000 VND PER 1 DAY	1	50.000 VND PER 1 DAY
11	NGUYEN VAN TUNG	2009-12-30	1-Common	TO USE THE TREE	1-Common	TO USE THE TREE	1-Common		2-Sometimes	BENKOCID	4-Never		4-Never			NO HAVE	FALSE		TRUE	TRUE	USE WATER TO CLEAN THE BOAT	FALSE		FALSE		TRUE	IN THE RIVER			TRUE	IN FRONT OF HOME IN THE RIVER	FALSE		FALSE	TRUE		FALSE	FALSE		FALSE			FALSE		1	50.000 VND PER 1 DAY
12	TG-DIEP THANH ANH	2009-12-13	1-Common	USE WATER TO CLEAN AND THROWN AWAY IN LOCAL RIVER	2-Sometimes	THROWN AWAY INTO LOCAL RIVER	4-Never		4-Never		4-Never		4-Never			NO HAVE	TRUE	TRUCK	FALSE	FALSE		FALSE		TRUE	TRUCK	FALSE				FALSE		TRUE	IN THE OUTSIDE	FALSE	FALSE		FALSE	TRUE		FALSE			FALSE		2	50.000 VND PER 1 TIME	50.000 VND PER 1 TIME	2	50.000 VND PER 1 TIME
13	TG-HO VAN LUA	2009-12-14	1-Common	USE WATER TO CLEAN AND THROWN AWAY IN LOCAL RIVER	1-Common	THROWN AWAY INTO LOCAL RIVER	2-Sometimes	THROWN AWAY INTO LOCAL RIVER	3-Not common	BENKOCID	4-Never		4-Never			NO HAVE	TRUE	TRUCK	FALSE	FALSE		FALSE		FALSE		FALSE				TRUE	IN FRONT OF HOME IN THE RIVER	FALSE		FALSE	TRUE		FALSE	FALSE		FALSE			FALSE		2	0	0	2	0
14	TG-HUYNH XUAN HA	2009-12-12	1-Common	USE WATER TO CLEAN AND THROWN AWAY IN LOCAL RIVER	1-Common	THROWN AWAY INTO LOCAL RIVER	4-Never		3-Not common	BEKOCID	4-Never		4-Never			NO HAVE	TRUE		FALSE	FALSE		FALSE		FALSE		FALSE				TRUE	IN GARAGE	FALSE		FALSE	FALSE		FALSE	FALSE		FALSE			FALSE
15	TG-NG THI DIEM HONG	2009-12-14	1-Common	USE WATER TO CLEAN AND THROWN AWAY IN LOCAL RIVER	1-Common	THROWN AWAY INTO LOCAL RIVER	1-Common	THROWN AWAY INTO LOCAL RIVER	1-Common	BENKOCID	4-Never		4-Never			NO HAVE	TRUE	TRUCK	FALSE	FALSE		FALSE		FALSE		FALSE				FALSE		FALSE		FALSE	FALSE		FALSE	FALSE		FALSE			FALSE		1	100.000 VND PER 1 DAYS
16	TG-NGUYEN THANH PHI	2009-12-13	1-Common	USE WATER TO CLEAN AND THROWN AWAY IN LOCAL RIVER	1-Common	THROWN AWAY INTO LOCAL RIVER	2-Sometimes	THROWN AWAY INTO LOCAL RIVER	2-Sometimes	BENKOCID	4-Never		4-Never				FALSE		FALSE	FALSE		FALSE		FALSE		FALSE				TRUE		TRUE		FALSE	FALSE		FALSE	FALSE		FALSE			FALSE		1
17	TG-NGUYEN VAN DUC	2009-12-14	1-Common	USE WATER TO CLEAN AND THROWN AWAY IN LOCAL RIVER	1-Common	THROWN AWAY INTO LOCAL RIVER	2-Sometimes	THROWN AWAY INTO LOCAL RIVER	3-Not common	BENKOCID	4-Never		4-Never			SOMTIME WE HAD TO STOP BY THE POLICE STATION	TRUE	TRUCK	FALSE	FALSE		FALSE		TRUE	TRUCK	FALSE				TRUE	IN FRONT OF HOME IN THE RIVER	FALSE		FALSE	TRUE		FALSE	FALSE		FALSE			FALSE		NO HAVE
18	TG-NGUYEN VAN HAI	2009-12-13	1-Common	USE WATER TO CLEAN AND THROWN AWAY IN LOCAL RIVER	1-Common	THROWN AWAY INTO LOCAL RIVER	4-Never		4-Never		4-Never		4-Never			NO HAVE	TRUE	TRUCK	FALSE	FALSE		FALSE		TRUE	TRUCK	FALSE				FALSE		TRUE	IN THE OUTSIDE	FALSE	FALSE		FALSE	TRUE		FALSE			FALSE		0			0
19	TG-NGUYEN VAN HUNG	2009-12-11	1-Common	USE WATER TO CLEAN AND THROWN AWAY IN LOCAL RIVER	1-Common	THROWN AWAY INTO LOCAL RIVER	2-Sometimes		3-Not common	BEKOCID	4-Never		4-Never			NO HAVE	FALSE		FALSE	FALSE		FALSE		FALSE		FALSE				TRUE	IN GARAGE	FALSE		FALSE	FALSE		FALSE	FALSE		FALSE			FALSE
20	TG-NGUYEN VAN OANH	2009-12-04	1-Common	USE WATER TO CLEAN AND THROWN AWAY IN LOCAL RIVER	1-Common	THROWN AWAY INTO LOCAL RIVER	4-Never		1-Common		4-Never		4-Never			NO HAVE	FALSE		TRUE	TRUE	USE WATER TO CLEAN THE BOAT	FALSE		FALSE		FALSE				FALSE		TRUE	IN THE OUTSIDE	FALSE	FALSE		FALSE	TRUE		FALSE			FALSE
21	TG-NGUYEN VAN TANH	2009-12-11	1-Common	USE WATER TO CLEAN AND THROWN AWAY IN LOCAL RIVER	1-Common	THROWN AWAY INTO LOCAL RIVER	3-Not common	OMO	4-Never		4-Never		4-Never			NO HAVE	FALSE		TRUE	TRUE	USE WATER TO CLEAN THE BOAT	FALSE		FALSE		TRUE	IN THE RIVER			TRUE	IN FRONT OF HOME IN THE RIVER	FALSE		FALSE	TRUE		FALSE	FALSE		FALSE			FALSE		2	0	0	0	0
22	TG-NGUYEN VAN TIEN	2009-12-13	1-Common	USE WATER TO CLEAN AND THROWN AWAY IN LOCAL RIVER	1-Common	THROWN AWAY INTO LOCAL RIVER	3-Not common	THROWN AWAY INTO LOCAL RIVER	4-Never		4-Never		4-Never				TRUE	TRUCK	TRUE	TRUE	USE WATER TO CLEAN THE TRUCK	FALSE		FALSE		TRUE	IN THE RIVER			TRUE		TRUE		TRUE	TRUE	IN THE RIVER	FALSE	FALSE		FALSE			FALSE
23	TG-NGUYEN VAN TU	2009-12-13	1-Common	USE WATER TO CLEAN AND THROWN AWAY IN LOCAL RIVER	2-Sometimes	THROWN AWAY INTO LOCAL RIVER	2-Sometimes	THROWN AWAY INTO LOCAL RIVER	3-Not common	BENCOCID	4-Never		4-Never			NO HAVE	TRUE	TRUCK	TRUE	TRUE	USE WATER TO CLEAN THE TRUCK	FALSE		FALSE		FALSE				TRUE	IN FRONT OF HOME IN THE RIVER	TRUE	IN THE OUTSIDE	FALSE	TRUE		FALSE	TRUE		FALSE			FALSE
24	TG-PHAM KIM HANG	2009-12-04	1-Common	USE WATER TO CLEAN AND THROWN AWAY IN LOCAL RIVER	2-Sometimes	THROWN AWAY INTO LOCAL RIVER	4-Never		4-Never		4-Never		4-Never			NO HAVE	FALSE		TRUE	TRUE	USE WATER TO CLEAN THE BOAT	FALSE		FALSE		FALSE				FALSE		TRUE	IN THE OUTSIDE	FALSE	FALSE		FALSE	TRUE		FALSE			FALSE		4	50.000 VND PER 1 PERSON	200.000 VND
25	TG-TRAN VAN MINH	2009-12-14	1-Common	USE WATER TO CLEAN AND THROWN AWAY IN LOCAL RIVER	1-Common	THROWN AWAY INTO LOCAL RIVER	1-Common	THROWN AWAY INTO LOCAL RIVER	4-Never		4-Never		4-Never			NO HAVE	FALSE		FALSE	FALSE		FALSE		FALSE		FALSE				FALSE		FALSE		FALSE	FALSE		TRUE	TRUE	TRUCK	FALSE			TRUE	TRUCK	4	150.000 VND PER 1 DAY PER 1 PERSON		2	150.000 VND PER 1 DAY PER 1 PERSON
26	TG-TRUONGNGMINH KHOA	2009-12-12	1-Common	USE WATER TO CLEAN AND THROWN AWAY IN LOCAL RIVER	1-Common	THROWN AWAY INTO LOCAL RIVER	2-Sometimes	OMO	4-Never		4-Never		4-Never			NO HAVE	TRUE	TRUCK	FALSE	FALSE		FALSE		FALSE		FALSE				TRUE	IN GARAGE	FALSE		FALSE	FALSE		FALSE	FALSE		FALSE			FALSE
27	TRAN THANH HAI	2009-12-05	1-Common	USE WATER TO CLEAN AND THROWN AWAY IN LOCAL RIVER	1-Common	THROWN AWAY INTO LOCAL RIVER	4-Never		1-Common	BENKOCID	4-Never		4-Never			NO HAVE	FALSE		TRUE	TRUE	USE WATER TO CLEAN THE BOAT	FALSE		FALSE		FALSE				FALSE		TRUE	IN THE OUTSIDE	FALSE	FALSE		FALSE	TRUE		FALSE			FALSE		2	100.000 VND PER 1 DAY
28	TRAN VAN HAU	2009-12-30	1-Common	USE WATER TO CLEAN AND THROWN AWAY IN LOCAL RIVER	1-Common	THROWN AWAY INTO LOCAL RIVER	4-Never		1-Common	BENKOCID	4-Never		4-Never			NO HAVE	FALSE		TRUE	TRUE	USE WATER TO CLEAN THE BOAT	FALSE		FALSE		TRUE	IN THE RIVER			TRUE	IN FRONT OF HOME IN THE RIVER	TRUE		FALSE	TRUE		FALSE	FALSE		FALSE			FALSE		1	50.000 VND PER 1 DAY	50.000 VND PER 1 DAY
29	TRAN VAN LUC	2009-12-30	1-Common	TO USE THE TREE	1-Common	THROWN AWAY INTO LOCAL RIVER	1-Common	THROWN AWAY INTO LOCAL RIVER	1-Common	BENKOCID	4-Never		4-Never			NO HAVE	FALSE		TRUE	TRUE	USE WATER TO CLEAN THE BOAT	FALSE		FALSE		FALSE				TRUE	IN FRONT OF HOME IN THE RIVER	FALSE		FALSE	TRUE		FALSE	FALSE		FALSE			FALSE		1	50.000 VND PER 1 DAY
30	VL-02NGVANNGUYEN	2009-12-05	1-Common	USE WATER TO CLEAN AND THROWN AWAY IN LOCAL RIVER	1-Common	THROWN AWAY INTO LOCAL RIVER	3-Not common	THROWN AWAY INTO LOCAL RIVER	1-Common	BENKOCID	4-Never		4-Never			NO HAVE	FALSE		TRUE	TRUE	USE WATER TO CLEAN THE BOAT	FALSE		FALSE		TRUE	IN THE RIVER			TRUE	IN FRONT OF HOME IN THE RIVER	FALSE		FALSE	TRUE		FALSE	FALSE		TRUE	IN THE RIVER		FALSE		1	50.000 VND PER 1 DAY
31	VL-03NGTHIKIMLOAN	2009-12-06	1-Common	USE WATER TO CLEAN AND THROWN AWAY IN LOCAL RIVER	1-Common	THROWN AWAY INTO LOCAL RIVER	4-Never		4-Never		4-Never		4-Never			NO HAVE	FALSE		TRUE	TRUE	USE WATER TO CLEAN THE BOAT	FALSE		FALSE		TRUE	IN THE RIVER			TRUE	IN FRONT OF HOME IN THE RIVER	FALSE		TRUE	TRUE	IN THE RIVER	FALSE	FALSE		TRUE	IN THE RIVER		FALSE		0	NONE	NONE	0	NONE
32	VL-04LE DUY THONG	2009-12-08	1-Common	TO USE THE TREE	1-Common	OUTSIDE HOUSE	1-Common	OUTSIDE HOUSE	1-Common	BENKOCID	4-Never		4-Never			NO HAVE	FALSE		FALSE	FALSE		FALSE		FALSE		TRUE	BEFORE TO TRANSPORT MOVING DUCK			TRUE	IN BEHIND HOUSE	FALSE		FALSE	FALSE		FALSE	FALSE		FALSE			FALSE		2	100.000 VND PER 1 TRIP
33	VL-06TRAN VAN THUAN	2009-12-08	1-Common	TO USE THE TREE	3-Not common	THROWN AWAY INTO LOCAL RIVER	4-Never		1-Common	BENCOCID,VIRKON	4-Never		4-Never			NO HAVE	FALSE		TRUE	TRUE	USE WATER TO CLEAN THE BOAT	FALSE		FALSE		TRUE	IN THE RIVER			TRUE	IN FRONT OF HOME IN THE RIVER	FALSE		TRUE	TRUE	IN THE RIVER	FALSE	FALSE		TRUE	IN THE RIVER		FALSE
34	VL07	2009-12-08	1-Common	TO USE THE TREE	1-Common	THROWN AWAY INTO LOCAL RIVER	4-Never		1-Common	VIRKON	4-Never		4-Never			NO HAVE	FALSE		TRUE	TRUE	USE WATER TO CLEAN THE BOAT	FALSE		FALSE		TRUE	IN THE RIVER			TRUE	IN FRONT OF HOME IN THE RIVER	FALSE		FALSE	TRUE		FALSE	FALSE		TRUE	IN THE RIVER		FALSE		1	100.000 VND PER 1 TRIP
35	VL07	2009-12-17	1-Common	USE WATER TO CLEAN AND THROWN AWAY IN LOCAL RIVER	1-Common	THROWN AWAY INTO LOCAL RIVER	4-Never		3-Not common	BENKOCID	4-Never		4-Never			NO HAVE	FALSE		TRUE	TRUE	USE WATER TO CLEAN THE BOAT	FALSE		FALSE		TRUE	IN THE RIVER			FALSE		TRUE	IN THE OUTSIDE	FALSE	TRUE		FALSE	TRUE		TRUE	IN THE RIVER		FALSE		1	100.000 VND PER 1 TRIP
36	VL-07TANG QUOC THANG	2009-12-05	1-Common	TO USE THE TREE	1-Common	THROWN AWAY INTO FISH POND	1-Common		1-Common	BENKOCID	4-Never		4-Never			NO HAVE	FALSE		FALSE	FALSE		FALSE		FALSE		TRUE	AT THE ARRIVAL AREA			FALSE		TRUE	IN THE OUTSIDE	FALSE	FALSE		FALSE	TRUE		FALSE			FALSE		2	100.000 PER 1 TRIP		2	100.000 VND PER 1 TRIP
37	VL09	2009-12-05	1-Common	USE WATER TO CLEAN AND THROWN AWAY IN LOCAL RIVER	1-Common	THROWN AWAY INTO LOCAL RIVER	4-Never		2-Sometimes	BENKOCID	4-Never		4-Never			NO HAVE	FALSE		TRUE	TRUE	USE WATER TO CLEAN THE BOAT	FALSE		FALSE		TRUE	IN THE RIVER			FALSE		FALSE		FALSE	FALSE		FALSE	FALSE		FALSE			FALSE		1	50.000 VND PER 1 DAY
38	VL09	2009-12-09	1-Common	USE WATER TO CLEAN AND THROWN AWAY IN LOCAL RIVER	1-Common	THROWN AWAY INTO LOCAL RIVER	4-Never		3-Not common	BENKOCID	4-Never		4-Never			NO HAVE	FALSE		TRUE	TRUE	USE WATER TO CLEAN THE BOAT	FALSE		FALSE		TRUE	AT THE QUANRANTINE LOCAL STATION			TRUE	IN FRONT OF HOME IN THE RIVER	FALSE		TRUE	TRUE	IN THE RIVER	FALSE	FALSE		FALSE			FALSE		1	50.000 VND PER 1 DAY		1	50.000 VND PER 1 DAY
39	VL09	2009-12-10	1-Common	USE WATER TO CLEAN AND THROWN AWAY IN LOCAL RIVER	1-Common	THROWN AWAY INTO LOCAL RIVER	4-Never		2-Sometimes	BENKOCID	4-Never		4-Never			NO HAVE	FALSE		TRUE	TRUE	USE WATER TO CLEAN THE BOAT	FALSE		FALSE		TRUE	IN THE RIVER			TRUE	IN FRONT OF HOME IN THE RIVER	FALSE		TRUE	TRUE	IN THE RIVER	FALSE	FALSE		FALSE			FALSE					1	100.000 VND PER 1 TRIP
40	VL10 AND DT05	2009-12-25	2-Sometimes	USE WATER TO CLEAN AND THROWN AWAY IN LOCAL RIVER	1-Common	THROWN AWAY INTO LOCAL RIVER	1-Common	THROWN AWAY INTO LOCAL RIVER	4-Never		4-Never		4-Never			NO HAVE	TRUE	TRUCK	FALSE	FALSE		FALSE		FALSE		FALSE				TRUE	IN FRONT OF HOME IN THE RIVER	FALSE		FALSE	TRUE		FALSE	FALSE		FALSE			FALSE		1	50.000 VND PER 1 TRIP	50.000 VND PER 1 TRIP	1	50.000 VND PER 1 TRIP
41	VL-10NGVANTHANH	2009-12-16	1-Common	TO USE THE TREE	1-Common	THROWN AWAY INTO LOCAL RIVER	1-Common	THROWN AWAY INTO LOCAL RIVER	1-Common	BENKOCID,VIRKON	4-Never		4-Never			NO HAVE	TRUE	TRUCK	FALSE	FALSE		FALSE		TRUE		FALSE				FALSE		FALSE		TRUE	TRUE	IN THE RIVER	FALSE	FALSE		FALSE			FALSE
42	VL11	2009-12-25	1-Common	USE WATER TO CLEAN AND THROWN AWAY IN LOCAL RIVER	1-Common	THROWN AWAY INTO LOCAL RIVER	4-Never		2-Sometimes	BENKOCID	4-Never		4-Never			NO HAVE	FALSE		TRUE	TRUE	USE WATER TO CLEAN THE BOAT	FALSE		FALSE		TRUE	IN THE RIVER			FALSE		FALSE		FALSE	TRUE		FALSE	FALSE		TRUE	IN THE RIVER		FALSE		1	50.000 VND PER 1 DAY	50.000 VND PER 1 DAY	1	50.000 VND PER 1 DAY
43	VL-11NGVANHOANGEM	2009-12-16	1-Common	USE WATER TO CLEAN AND THROWN AWAY IN LOCAL RIVER	1-Common	THROWN AWAY INTO LOCAL RIVER	2-Sometimes	THROWN AWAY INTO LOCAL RIVER	4-Never		4-Never		4-Never			NO HAVE	FALSE		TRUE	TRUE	USE WATER TO CLEAN THE BOAT	FALSE		FALSE		TRUE	IN THE RIVER			FALSE		TRUE	IN THE OUTSIDE	FALSE	FALSE		FALSE	TRUE		FALSE			FALSE
[truncated: 51 more columns]
